# Supplementary material
Source: Springer Nature journal article supplement (https://www.springermedizin.de/resource/supplementary/12885_2013_4548_MOESM5_ESM.pdf/9466686)

N1 T1 N2 T2 N3 T3 N4 T4 N5 T5 N6 T6 N7 T7 N8 T8

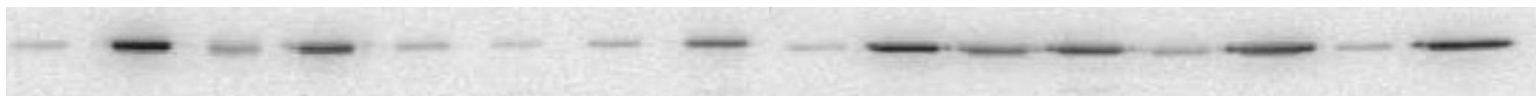

CALR

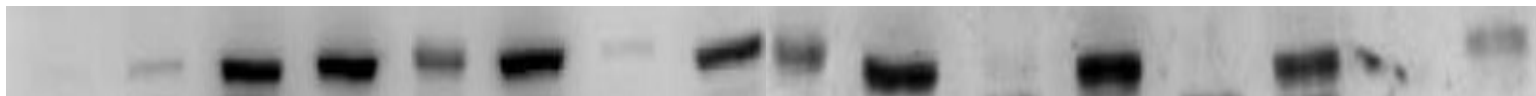

Annexin A2

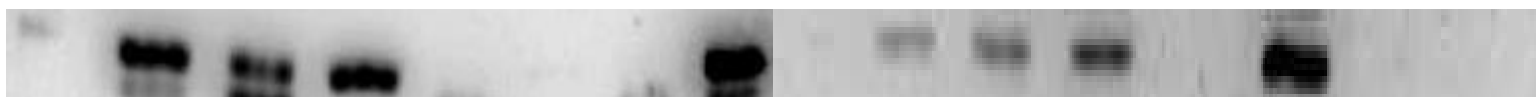

Annexin A3

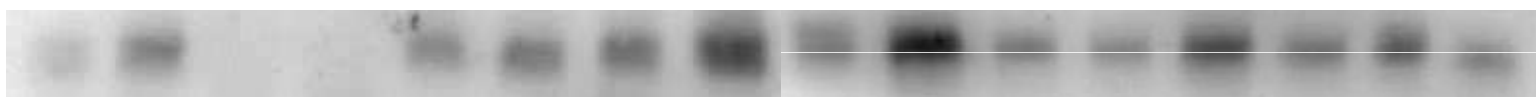

Hp

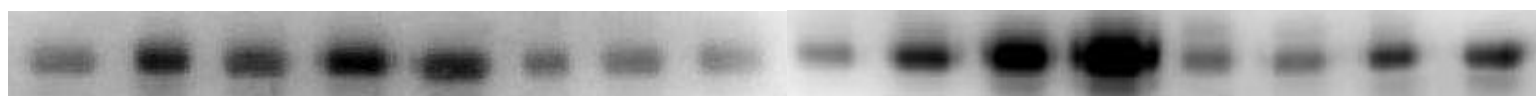

ZAG

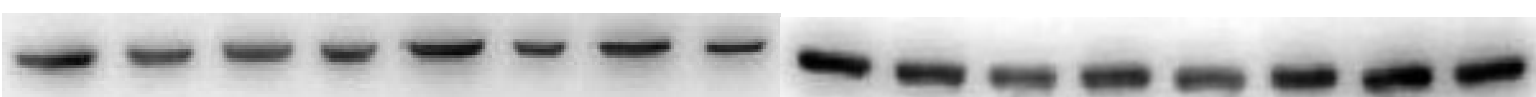

$\beta$ -actin

Supplement: MOESM5 [file 9466686]
